# Supplementary material for: AGO2 protein: a key enzyme in the miRNA pathway as a novel biomarker in adrenocortical carcinoma
Source: PubMed Central journal article supplement (PMC11623120; doi:10.1530/erc-24-0061), 2024-11-20
Supplement: supplementary_table_1.pdf [file supplementary_table_1.pdf]

Supplementary Table 1: Table 1. **Pan-Cancer AGO2 expression and survival analysis in TCGA cohorts.** This table summarizes the hazard ratios (HR) for AGO2 expression across 32 TCGA cancer types, highlighting its prognostic significance, particularly in ACC with an HR of 7.07 (p value 2.80E-06)

| Cancer | Cancer Number | p-value (significant threshold <0.05) | HR   |
|--------|---------------|---------------------------------------|------|
| ACC    | 79            | 2.80E-06                              | 7.07 |
| MESO   | 85            | 0.00053                               | 2.36 |
| UCEC   | 537           | 0.0052                                | 1.83 |
| SARC   | 261           | 0.0092                                | 1.71 |
| KIRP   | 288           | 0.016                                 | 2.15 |
| CHOL   | 36            | 0.044                                 | 0.38 |
| LGG    | 523           | 0.065                                 | 1.39 |
| BRCA   | 1082          | 0.087                                 | 1.32 |
| THYM   | 118           | 0.1                                   | 0.29 |
| LIHC   | 369           | 0.12                                  | 1.32 |
| KICH   | 64            | 0.21                                  | 2.35 |
| UVM    | 80            | 0.23                                  | 1.69 |
| CESC   | 306           | 0.27                                  | 1.3  |
| OV     | 374           | 0.36                                  | 1.13 |
| READ   | 159           | 0.36                                  | 0.69 |
| LUAD   | 503           | 0.43                                  | 1.13 |
| UCS    | 56            | 0.43                                  | 1.32 |
| ESCA   | 162           | 0.49                                  | 0.84 |
| STAD   | 365           | 0.5                                   | 0.89 |
| HNSC   | 495           | 0.56                                  | 0.92 |
| PCPG   | 183           | 0.57                                  | 1.52 |
| BLCA   | 406           | 0.61                                  | 1.08 |
| LUSC   | 469           | 0.67                                  | 1.06 |
| SKCM   | 440           | 0.73                                  | 0.95 |
| TGCT   | 139           | 0.75                                  | 0.72 |
| PRAD   | 495           | 0.76                                  | 1.22 |
| LAML   | 75            | 0.79                                  | 0.93 |
| PAAD   | 178           | 0.8                                   | 1.06 |
| KIRC   | 517           | 0.81                                  | 1.04 |
| DLBC   | 47            | 0.82                                  | 1.18 |
| THCA   | 509           | 0.84                                  | 1.11 |
| COAD   | 447           | 0.87                                  | 1.03 |
