# Supplementary material for: AGO2 protein: a key enzyme in the miRNA pathway as a novel biomarker in adrenocortical carcinoma
Source: PubMed Central journal article supplement (PMC11623120; doi:10.1530/erc-24-0061), 2024-11-20
Supplement: supplementary_table_2.pdf [file supplementary_table_2.pdf]

**Supplementary Table 2: Comparative Analysis of AGO2 mRNA and Protein Levels Against Clinicopathological Parameters and Their Prognostic Significance in TCGA-ACC and an Independent ACC Cohort.**

| Parameters                             | TCGA-ACC cohort (n=79) | AGO2 mRNA expression in TCGA (log2) | p-value              | Collected-ACC cohort (n=15) (Kollings Tumour bank) | AGO2 Protein concentration in collected cohort (ng/ml) | p-value |
|----------------------------------------|------------------------|-------------------------------------|----------------------|----------------------------------------------------|--------------------------------------------------------|---------|
| <b>Diagnosis Age</b>                   | 46.7 ± 15.77           |                                     | 0.672                | 46.27 ± 15.47                                      |                                                        | 0.833   |
| <49                                    | 39                     | 6.64 ± 0.77                         |                      | 9                                                  | 6.66 ± 2.71                                            |         |
| >49                                    | 40                     | 6.72 ± 0.9                          |                      | 6                                                  | 7.03 ± 4.14                                            |         |
| <b>Sex</b>                             |                        |                                     | 0.254                |                                                    |                                                        | 0.484   |
| Female                                 | 48                     | 6.59 ± 0.8                          |                      | 8                                                  | 6.24 ± 2.97                                            |         |
| Male                                   | 31                     | 6.82 ± 0.88                         |                      | 7                                                  | 7.46 ± 3.6                                             |         |
| <b>Overall survival status</b>         |                        |                                     | <0.001               |                                                    |                                                        | 0.009   |
| Alive                                  | 51                     | 6.44 ± 0.7                          |                      | 9                                                  | 5.16 ± 2.42                                            |         |
| Deceased                               | 28                     | 7.11 ± 0.89                         |                      | 6                                                  | 9.28 ± 2.72                                            |         |
| <b>Weiss score</b>                     |                        |                                     | 0.003                |                                                    |                                                        | 0.008   |
| Weiss score (2-5)                      | 30                     | 6.32 ± 0.8                          |                      | 4                                                  | 3.43 ± 1.86                                            |         |
| Weiss score (6-9)                      | 31                     | 6.9 ± 0.83                          |                      | 11                                                 | 8.04 ± 2.69                                            |         |
| <b>Pathologic stage</b>                |                        |                                     | 0.011                |                                                    |                                                        | 0.004   |
| Stage I-II                             | 46                     | 6.49 ± 0.78                         |                      | 5                                                  | 3.76 ± 1.77                                            |         |
| Stage III-IV                           | 31                     | 6.93 ± 0.87                         |                      | 10                                                 | 8.33 ± 2.64                                            |         |
| <b>Cluster of clusters (CoCs)</b>      | n=76                   |                                     | 0.036 (COC1 vs COC3) |                                                    |                                                        |         |
| COC1 (Disease progression rate: (7%))  | 33                     | -0.16 ± 0.91                        |                      |                                                    |                                                        |         |
| COC2 (Disease progression rate: (56%)) | 19                     | -0.18 ± 1.14                        |                      |                                                    |                                                        |         |
| COC3 (Disease progression rate: (96%)) | 24                     | 0.31 ± 1.01                         |                      |                                                    |                                                        |         |

The data are presented as the means ± SDs or n (numbers).  
Abbreviations: TCGA, The Cancer Genome Atlas
